# Supplementary material for: Influence of lithium salt-induced phase separation on thermal behaviors of poly(vinylidene fluoride)/ionic liquid gels and pore/void formation by competition with crystallization
Source: Royal Society of Chemistry journal article supplement (doi:10.1039/c8ra08514e), 2018-01-01
Supplement: c8ra08514e1.pdf [file c8ra08514e1.pdf]

## Supplementary information

### **Influence of Lithium Salt-Induced Phase Separation on Thermal Behaviors of Poly(vinylidene fluoride)/Ionic liquid Gels and Pore/Void Formation by Competition with Crystallization**

Noboru Osaka<sup>1\*</sup>, Yuichi Minematsu<sup>1</sup>, Masatoshi Tosaka<sup>2</sup>

<sup>1</sup>Department of Chemistry, Faculty of Science, Okayama University of Science, 1-1

Ridai-cho, Kita-ku, Okayama 700-0005, Japan

<sup>2</sup>Institute for Chemical Research, Kyoto University, Gokasho, Uji, Kyoto 611-0011,

Japan

\* Corresponding author. E-mail: [osaka@chem.ous.ac.jp](mailto:osaka@chem.ous.ac.jp)

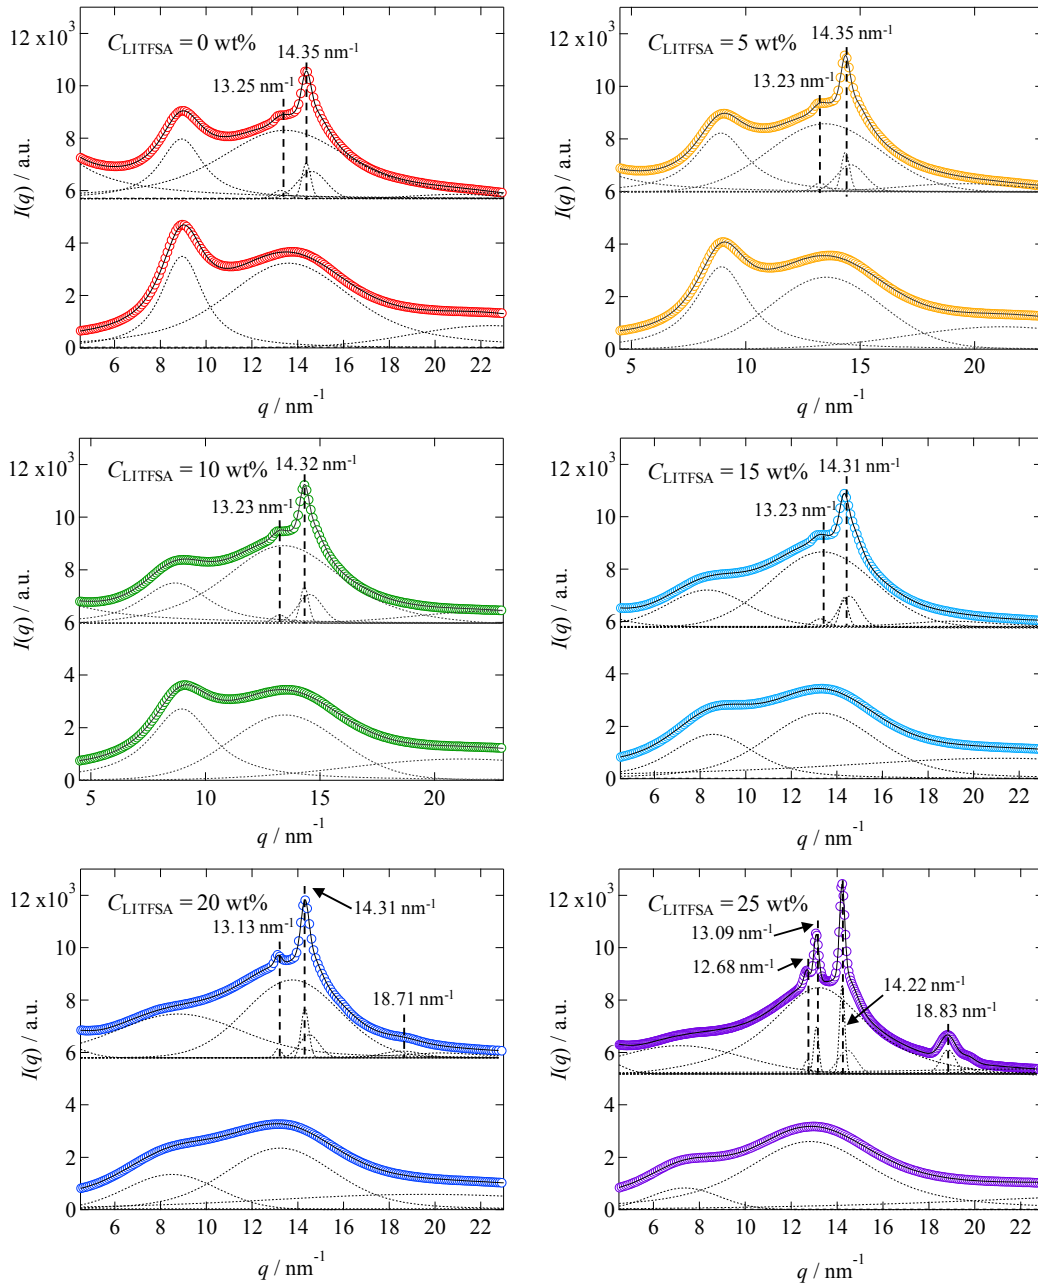

**Figure S1.** Results of fitting on the WAXS profiles of  $[\text{C}_2\text{mim}][\text{TFSA}]/\text{LiTFSA}$  solutions (down) and  $\text{PVDF}/[\text{C}_2\text{mim}][\text{TFSA}]/\text{LiTFSA}$  gels (top) depending on  $C_{\text{LiTFSA}}$  at 20 °C. The dotted curves for fits are Voigt functions for  $[\text{C}_2\text{mim}][\text{TFSA}]$  and Gaussian functions for PVDF, respectively.

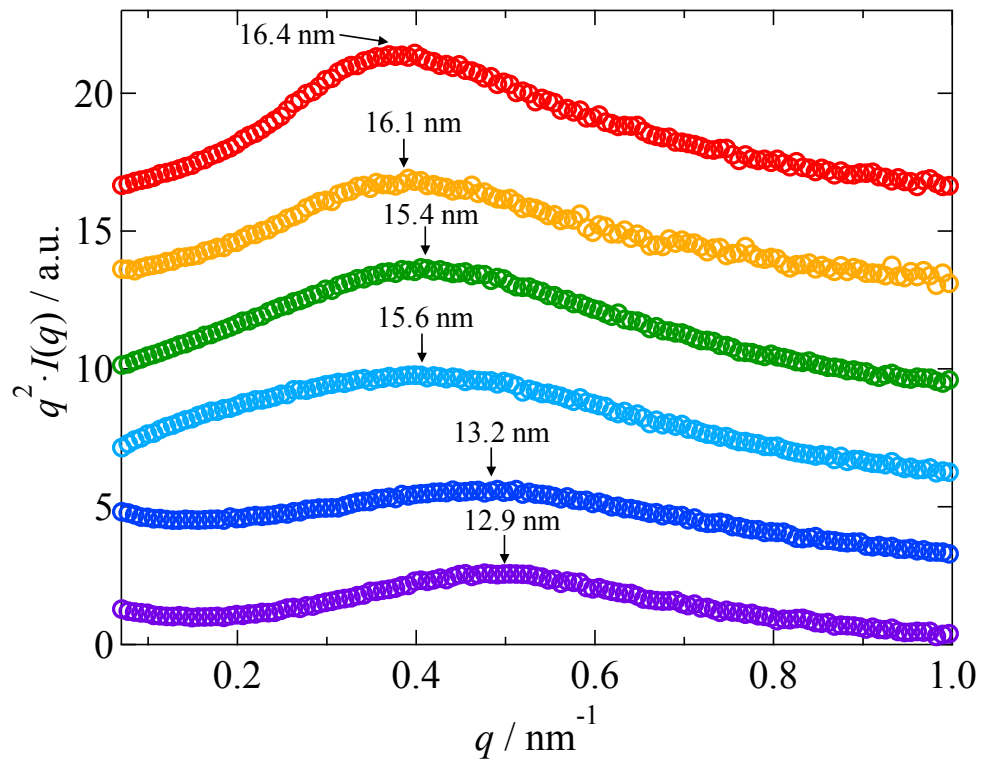

**Figure S2.** Lorentz-corrected SAXS curves of PVDF/[C<sub>2</sub>mim][TFSA]/LiTFSA gels depending on  $C_{\text{LiTFSA}}$  obtained at 20 °C. The arrows indicate the peak positions and the corresponding periodic long distances obtained by Bragg's equation from the peak positions.

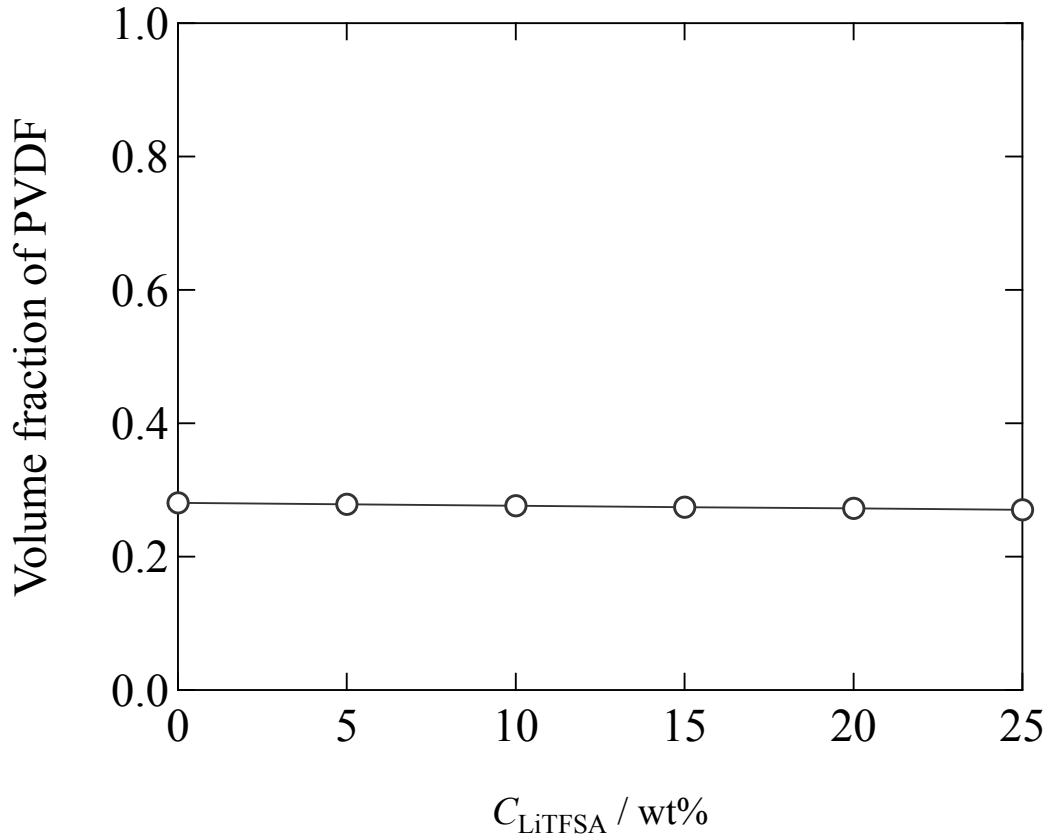

**Figure S3.** The estimated volume fractions of PVDF in PVDF/[C<sub>2</sub>mim][TFSA]/LiTFSA gels depending on  $C_{LiTFSA}$ .

Volume fraction of PVDF was estimated by the following equation,

$$\text{volume fraction of PVDF} = \frac{\frac{\varphi_{PVDF}}{d_{PVDF}}}{\frac{\varphi_{PVDF}}{d_{PVDF}} + \frac{\varphi_{[C_2mim][TFSA]}}{d_{[C_2mim][TFSA]}} + \frac{\varphi_{LiTFSA}}{d_{LiTFSA}}}$$

$\varphi_{PVDF}$ ,  $\varphi_{[C_2mim][TFSA]}$ , and  $\varphi_{LiTFSA}$  are weight fractions of PVDF, [C<sub>2</sub>mim][TFSA], and LiTFSA, respectively.  $d_{PVDF}$ ,  $d_{[C_2mim][TFSA]}$ , and  $d_{LiTFSA}$  are densities of PVDF, [C<sub>2</sub>mim][TFSA], and LiTFSA, respectively.  $d_{PVDF}$  is 1.68 g/cm<sup>3</sup> for amorphous PVDF [S1].  $d_{[C_2mim][TFSA]}$  is 1.52 g/cm<sup>3</sup> for [C<sub>2</sub>mim][TFSA] [S2].  $d_{LiTFSA}$  is 1.33 g/cm<sup>3</sup> for LiTFSA [S3].

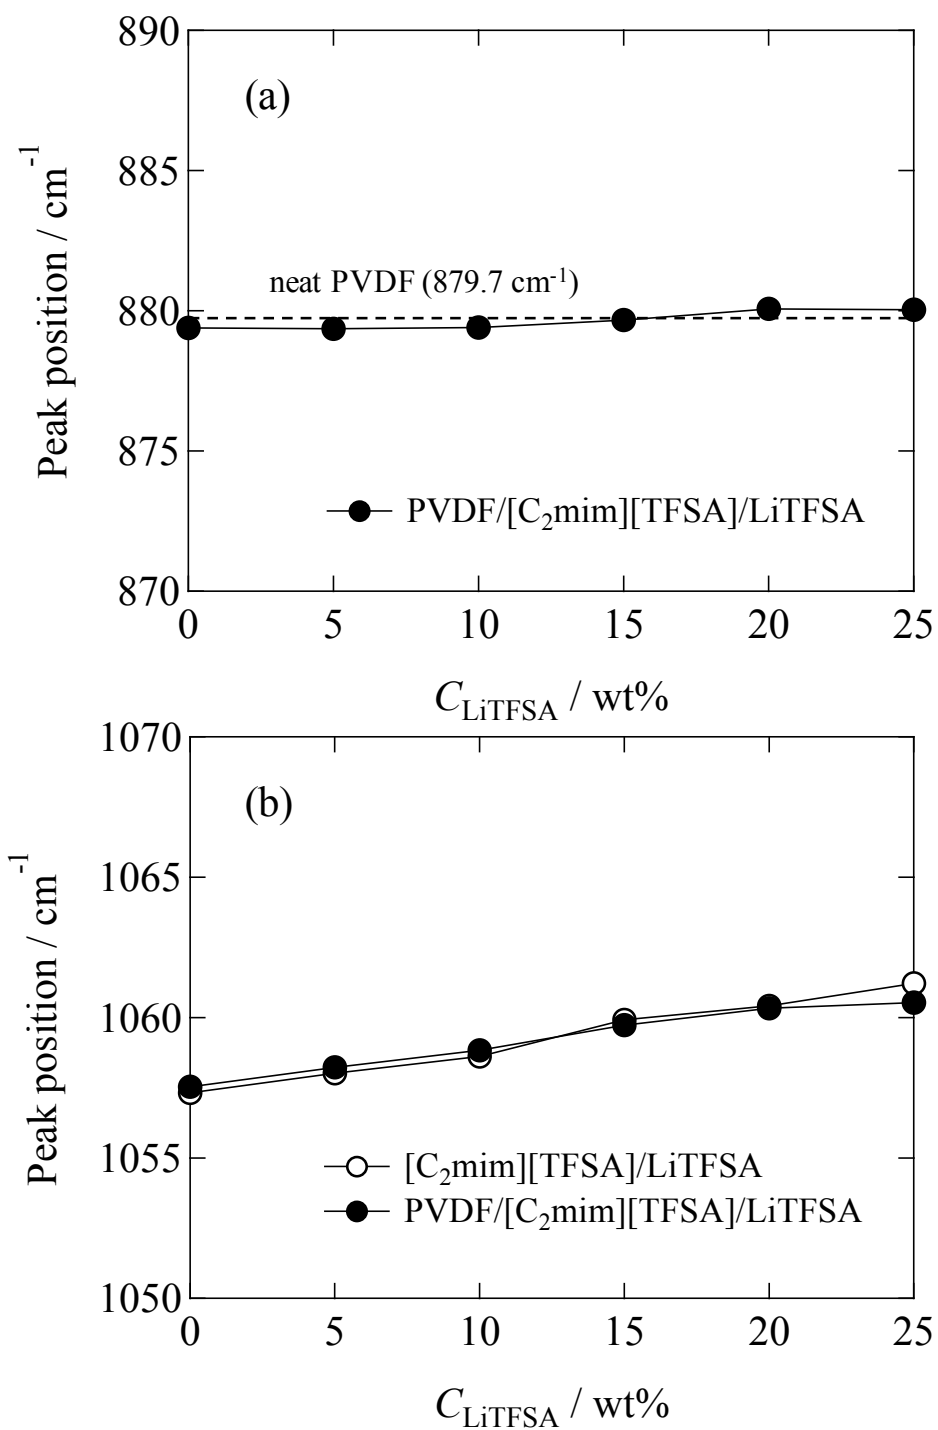

**Figure S4.** (a) Peak positions of FT-IR spectra depending on  $C_{\text{LiTFSA}}$  obtained at  $185 \text{ }^\circ\text{C}$  in the regions of (a)  $\text{CF}_2\text{-CH}_2$  bending vibration of PVDF and (b)  $\text{SO}_2$  symmetric stretching vibration of [ $\text{TFSA}^-$ ] anion interacting with cation.

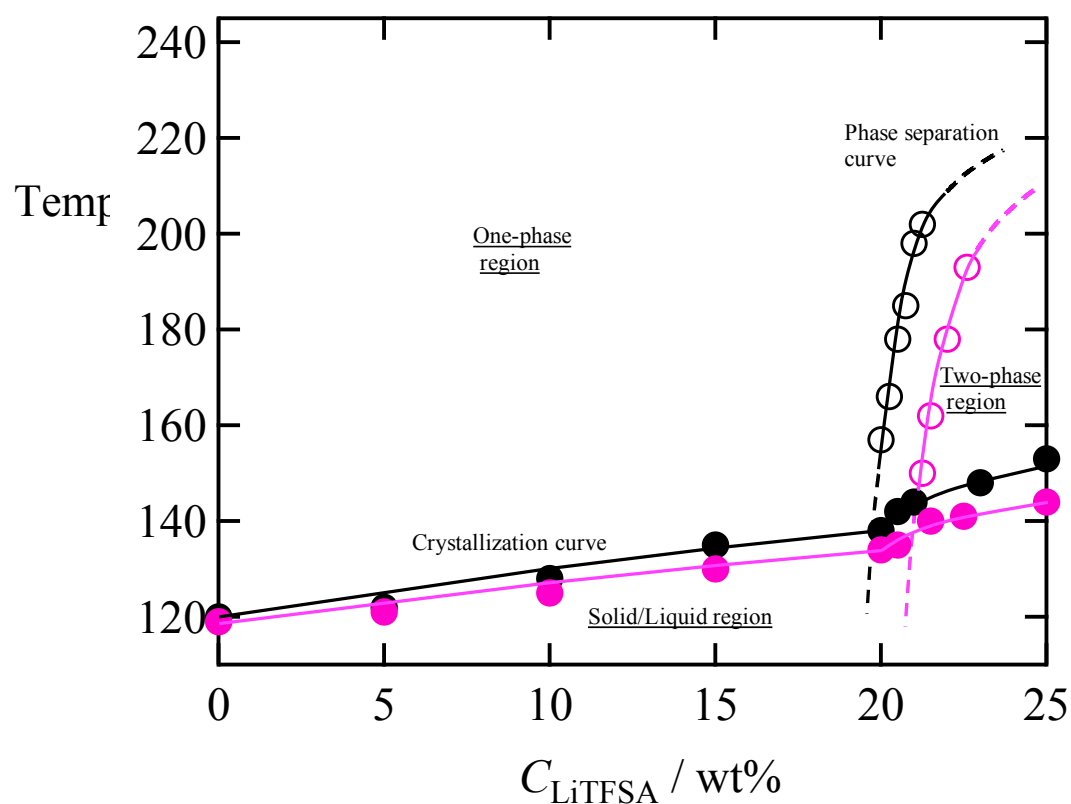

**Figure S5.** Summary of phase behaviors of the PVDF/[C<sub>2</sub>mim][TFSA]/LiTFSA systems (black color) and the PVDF/[C<sub>2</sub>dmim][TFSA]/LiTFSA systems (magenta color) obtained by cooling at 1 °C/min. Solid circles (●, ●) represent the crystallization temperatures and opaque circles (○, ○) represent the phase separation temperatures. The onset temperatures of the phase transitions were determined by using polarized optical microscope. [C<sub>2</sub>dmim][TFSA] (99%) was purchased from IoLiTec.

## References

- S1. Ameduri, B., *Chem Rev*, 2009, **109**, 6632-6686.
- S2. Kadyan, A.; Pandey, S., *J Chem Thermodyn*, 2018, **116**, 159-165.

S3. Lannelongue, P., Bouchal, R., Mourad, E., Bodin, C., Olarte, M., le Vot, S., Favier, F. and Fontaine, O., *J Electrochem Soc*, 2018, **165**, A657-663.
